# Supplementary material for: Intervention through Short Messaging System (SMS) and phone call alerts reduced HbA1C levels in ~47% type-2 diabetics–results of a pilot study
Source: PubMed Central journal article supplement (PMC7671489; doi:10.1371/journal.pone.0241830), 2020-11-17

## Annexure-5

### Diabetes Educational Short Messages Sent to Study Participants

ಮಧುಮೇಹ ನಿರ್ವಹಣೆ ಕುರಿತು ಕಾರ್ಯಕ್ರಮ ಜೆ. ಎಸ್. ಎಸ್ ಆಸ್ಪತ್ರೆ (ಮಧುಮೇಹ ಪರಿಶೋಧನೆ ಮಾಡುವ ಕೊಠಡಿಯ ಸಮೀಪ)  
ಸಮಯ: ಬೆಳಿಗ್ಗೆ 10.30  
ದಿನಾಂಕ: 9.12.17 ಶನಿವಾರ  
ಉಚಿತ ಮಧುಮೇಹ ಪರಿಶೋಧನೆ ಮಾಡಲಾಗುವುದು

Diabetes Management Program at JSS Hospital  
Time: 10.30 am  
Date: Saturday 9.12.2017  
Free blood investigations will be conducted

\*\*\*\*\*

\*\*\*\*ಮಧುಮೇಹ ನಿರ್ವಹಣೆ\*\*\*\*

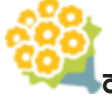

ಹೊಸ ವರ್ಷದ ಹಾರ್ದಿಕ ಆರೋಗ್ಯದಾಯಕ ಶುಭಾಶಯಗಳು

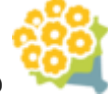

Diabetes Management  
Wish you a very happy new year

\*\*\*\*\*

"ನಿಮ್ಮ ಮಧುಮೇಹ ನಿಮ್ಮ ನಿರ್ವಹಣೆಯ ಕೈಯಲ್ಲಿ"  
ನಿಯಮಿತವಾಗಿ ಕೆಳಗಿನ ನಿಯಮಗಳನ್ನು ಕಡ್ಡಾಯವಾಗಿ ಪಾಲಿಸಿ  
ಋಣಿಯಮಿತವಾಗಿ ಆಹಾರವನ್ನು ಸ್ವಲ್ಪ ಸ್ವಲ್ಪ ಸೇವಿಸಿ

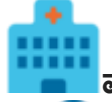

ವೈದ್ಯರನ್ನು ಸಂಪರ್ಕಿಸಿ

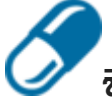

ಔಷಧಗಳನ್ನು ತೆಗೆದುಕೊಳ್ಳಿ

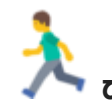

ಧೈಯಕ ವ್ಯಾಯಾಮ ಮಾಡಿ

\*\*\*\*ಮಧುಮೇಹ ನಿರ್ವಹಣೆ\*\*\*\*

Your diabetes in your control  
Kindly follow the below  
Take limited quantities of food at regular intervals  
Visit your doctor periodically  
Take your medications as prescribed by your doctor  
Regularly do your physical activity  
\*\*\*\*\* Diabetes Management\*\*\*\*\*

\*\*\*\*\*

ಮಧುಮೇಹ (ಡಯಾಬಿಟಿಸ್) ಔಷಧವು ರಕ್ತದಲ್ಲಿನ ಸಕ್ಕರೆಯನ್ನು ನಿಯಂತ್ರಿಸುತ್ತದೆ. ಆದ್ದರಿಂದ ವೈದ್ಯರು ಸೂಚಿಸಿದಂತೆ ಯಾವಾಗಲೂ ನಿರ್ದಿಷ್ಟ ಸಮಯದಲ್ಲಿ ಔಷಧಿಗಳನ್ನು ತೆಗೆದುಕೊಳ್ಳಿ ಹಾಗೆ ವೈದ್ಯರನ್ನು ತಪ್ಪದೇ ಭೇಟಿ ಮಾಡಿ.

Diabetic medications will control the blood glucose values. As directed by your doctor adhere to your medications and visit doctor periodically

\*\*\*\*\*

**\*\*ಮಧುಮೇಹ ನಿರ್ವಹಣೆ\*\***

ಮಧುಮೇಹ ಆಹಾರದಲ್ಲಿ ಹೆಚ್ಚಿನ ಸಂಖ್ಯೆಯ ಹಸಿ ತರಕಾರಿಗಳನ್ನು ಒಳಗೊಂಡಿರಬೇಕು

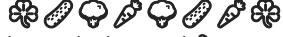

ಸಣ್ಣ ಪ್ರಮಾಣದಲ್ಲಿ ಆಹಾರವನ್ನು ಆಗಾಗ ಸೇವಿಸಿ

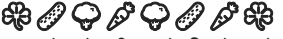

**\*\*ಮಧುಮೇಹ ನಿರ್ವಹಣೆ\*\***

**\*\* Diabetes Management\*\***

Diabetic diet should contain a greater number of green vegetables

Consume small quantities of food at regular intervals

**\*\* Diabetes Management\*\***

\*\*\*\*\*

**\*\*ಮಧುಮೇಹ ನಿರ್ವಹಣೆ\*\***

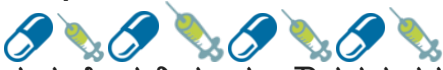

ಮಧುಮೇಹ ನಿಯಂತ್ರಣ ಔಷಧವು ರಕ್ತದಲ್ಲಿನ ಸಕ್ಕರೆಯ ಅಂಶವನ್ನು ನಿಯಂತ್ರಿಸುತ್ತದೆ ಆದ್ದರಿಂದ ವೈದ್ಯರು ಸೂಚಿಸಿದಂತೆ ಯಾವಾಗಲೂ ನಿರ್ದಿಷ್ಟ ಸಮಯದಲ್ಲಿ ಔಷಧಿಗಳನ್ನು ತೆಗೆದುಕೊಳ್ಳಿ

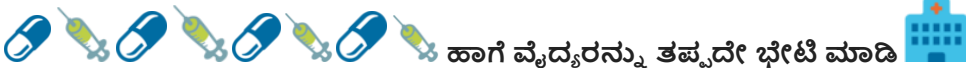

**\*\*ಮಧುಮೇಹ ನಿರ್ವಹಣೆ\*\***

**\*\* Diabetes Management\*\***

Diabetes medications control the quantity of glucose in blood. So, as directed by your doctor don't miss your medications. I required, consult your doctor

**\*\* Diabetes Management\*\***

\*\*\*\*\*

**\*\*ಮಧುಮೇಹ ನಿರ್ವಹಣೆ\*\***

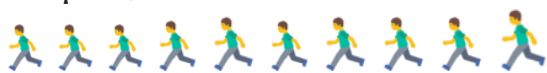

ದೈಹಿಕ ವ್ಯಾಯಾಮವು ರಕ್ತದಲ್ಲಿನ ಸಕ್ಕರೆ ಅಂಶವನ್ನು ನಿಯಂತ್ರಣದಲ್ಲಿಟ್ಟುಕೊಳ್ಳುವಲ್ಲಿ ಮಹತ್ವದ ಪಾತ್ರ ವಹಿಸುತ್ತದೆ. ಆದ್ದರಿಂದ ಕನಿಷ್ಠ 30 ನಿಮಿಷಗಳ ಕಾಲ ದೈನಂದಿನ ದೈಹಿಕ ವ್ಯಾಯಾಮ ಮಾಡಿ

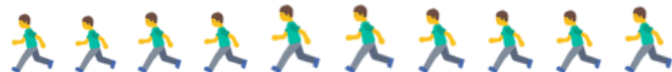

**\*\*ಮಧುಮೇಹ ನಿರ್ವಹಣೆ\*\***

**\*\* Diabetes Management\*\***

Regular physical activity plays a significant role in controlling blood glucose. Physical activity for a minimum of 30 minutes to be done everyday

**\*\* Diabetes Management\*\***

\*\*\*\*\*

\*\*\*ಮಧುಮೇಹ ನಿರ್ವಹಣೆ\*\*\*

ಕ್ರೋಮಧ್ಯಪಾನದಿಂದ ರಕ್ತದಲ್ಲಿನ ಸೆಕ್ಕರೆಯ ಮಟ್ಟ ಹೆಚ್ಚಾಗುತ್ತದೆ

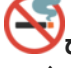

ಧೂಮಪಾನ ಸೆಕ್ಕರೆ ಕಾಯಲೆಯ ಸಮಸ್ಯೆಗಳನ್ನು ಹೆಚ್ಚಿಸುತ್ತದೆ  
\*\*\*ಮಧುಮೇಹ ನಿರ್ವಹಣೆ\*\*\*

\*\* Diabetes Management\*\*

Consumption of alcohol elevates the blood glucose values. Smoking increases the risk for diabetes associated complications. Consumption of alcohol and smoking should be avoided

\*\* Diabetes Management\*\*

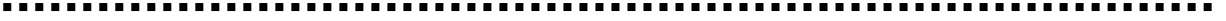

Supplement: pone.0241830.s010.pdf [file pone.0241830.s010.pdf]
