# Supplementary material for: Intervention through Short Messaging System (SMS) and phone call alerts reduced HbA1C levels in ~47% type-2 diabetics–results of a pilot study
Source: PubMed Central journal article supplement (PMC7671489; doi:10.1371/journal.pone.0241830), 2020-11-17
Supplement: pone.0241830.s001.pdf [file pone.0241830.s001.pdf]

# JSS MEDICAL COLLEGE

(Constituent College)

**Jagadguru Sri Shivarathreeshwara University**

(Deemed to be University)  
Accredited 'A' Grade by NAAC

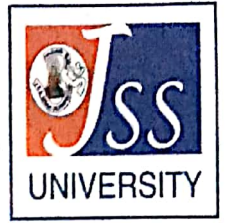

JSSMC/IEC/11 / 5976 /2016-17

Date: 30.11.2016

## Members

**Dr. M.Premanath**  
MD. General Medicine  
Chairman

**Dr.H.Basavana Gowdappa**  
MD. General Medicine  
Member

**Dr. R.Rajalakshmi**  
MD Physiology  
Member

**Dr.M.Guruswamy**  
MS. ENT  
Member

**Sri.NagendraMurthy M.P**  
B.Com. LL.M, M.Phil.  
Member

**Smt. Sudhaphaneesh**  
M.A., B.Ed.,(Ph.D)  
Member

**Dr.Madan Ramesh,**  
M.Pharm, PhD  
Member

**Sri. R.S.Nagaraj**  
B.Sc, MBA  
Member

**Dr.R.N.Suresha**  
MD. Pharmacology  
Member Secretary

**Dr. P. Salimath**  
Director Research  
Special Invitee

## INSTITUTIONAL ETHICAL COMMITTEE

### CERTIFICATE

This is to certify that the below mentioned Project has been cleared and approved by the Institutional Ethical Committee at its meeting held on 29.11.2016.

|                               |                                                                                                                        |
|-------------------------------|------------------------------------------------------------------------------------------------------------------------|
| <b>Title of Project</b>       | " Effectiveness of Self Management in Type 2 Diabetic Patients Through ICT Interventions."                             |
| <b>Principal Investigator</b> | <b>Mrs. Kanakavalli K Kundury</b><br>Lecturer<br>Dept of Health System Management Studies,<br>JSS University<br>Mysore |

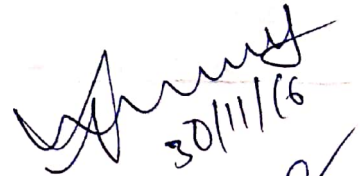  
30/11/16

**MEMBER SECRETARY**

Member Secretary,  
Institutional Ethical Committee  
J.S.S. Medical College, S.S.  
MYSORE-570 015
