# Supplementary material for: Intervention through Short Messaging System (SMS) and phone call alerts reduced HbA1C levels in ~47% type-2 diabetics–results of a pilot study
Source: PubMed Central journal article supplement (PMC7671489; doi:10.1371/journal.pone.0241830), 2020-11-17
Supplement: pone.0241830.s003.pdf [file pone.0241830.s003.pdf]

## **Patient Demographics and Diabetes Self-Management Questionnaire**

Patient ID: \_\_\_\_\_

Telephone: \_\_\_\_\_

Name: \_\_\_\_\_

Age Group: 30 to 40 / 41 to 50 / 51 to 60 / 61 to 70 / 71 to 80

Gender: M \_\_\_ F \_\_\_

Address: \_\_\_\_\_

e-mail: \_\_\_\_\_

Domicile Category: Urban / Semi Urban / Rural

Work: Agriculture / Office / Service / Home Maker

Since how long are you diabetic? \_\_\_\_\_

**How frequently do you visit the doctor?**

Once in 3 months / Once in 3-6 months / More than 6 months

**How frequently do you get your blood testing done?**

Once in 3 months / Once in 3-6 months / More than 6 months

**What tests are normally done?**

Fasting / PPBS / HbA1C / Lipid

**Under what range will your HbA1C score stays**

Less than 6 / Between 6 and 8 / Above 8

**Do you adhere to the diet restrictions?**

Always / Sometimes / Never

**Under what kind of medication form are you in**

Single therapy / Multiple therapy / Insulin

**How much time do you spend every day on physical activity ( walking, jogging, yoga or any fitness program)**

Less than 1 hour / Between 1-2 hours / Not everyday

**How often you inspect your foot and take eye examinations?**

Always / Sometimes / Never

**Are you aware of self-management of diabetes**

Yes / No

**Signature of the patient:** \_\_\_\_\_
