# Supplementary material for: Intervention through Short Messaging System (SMS) and phone call alerts reduced HbA1C levels in ~47% type-2 diabetics–results of a pilot study
Source: PubMed Central journal article supplement (PMC7671489; doi:10.1371/journal.pone.0241830), 2020-11-17
Supplement: pone.0241830.s004.pdf [file pone.0241830.s004.pdf]

# Diabetes Management

**JSS Academy of Higher Education and Research**  
JSS Medical Institutions Campus  
Sri Shivarathreeshwara Nagara  
Mysuru – 570 015, Karnataka, INDIA  
**Phone:** +91-821-2548416 / 400 **Fax:** +91-821-2548394

# Diabetes

- Diabetes is a disease that occurs when your blood glucose, also called blood sugar, is too high
- Insulin, a hormone made by the pancreas, helps glucose from food get into your cells to be used for energy
- Sometimes your body doesn't make enough insulin or doesn't use insulin well
- Glucose then stays in your blood and doesn't reach your cells. having too much glucose in your blood can cause health problems

# Diabetes

## Type1:

- Body is unable to produce any insulin.
- Appears before the age of 40

## Type2:

- Body can still make some insulin, but not enough
- Most commonly seen in ages above 40
- 85-90% diabetes is of this type

## Gestational diabetes

- Arises during pregnancy

# Symptoms of Diabetes

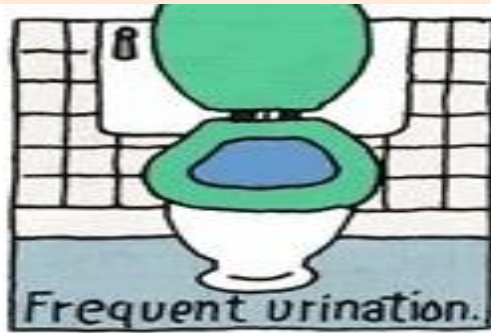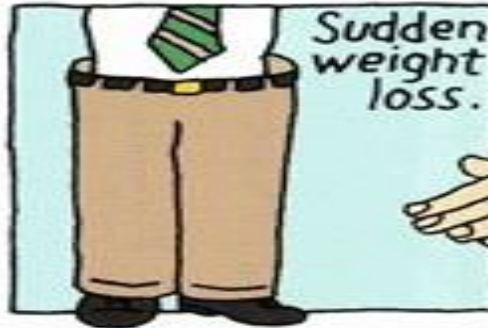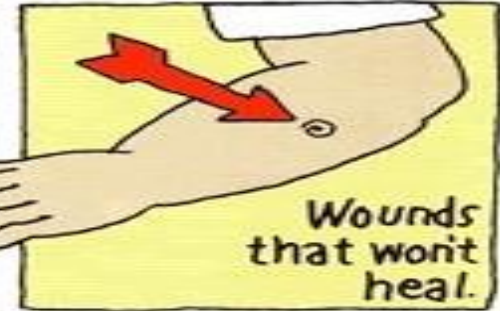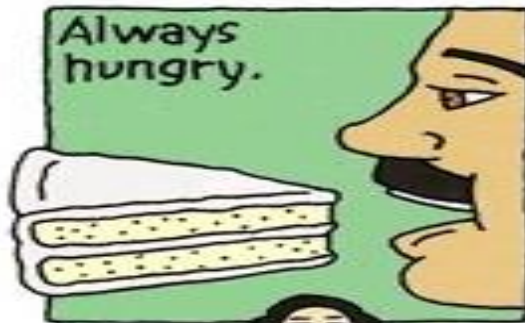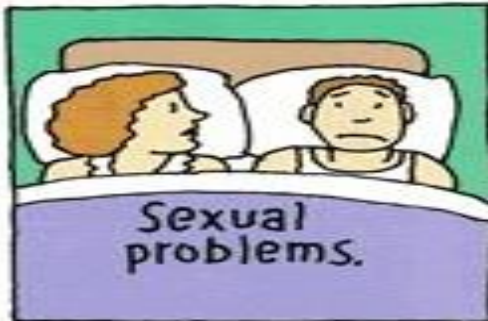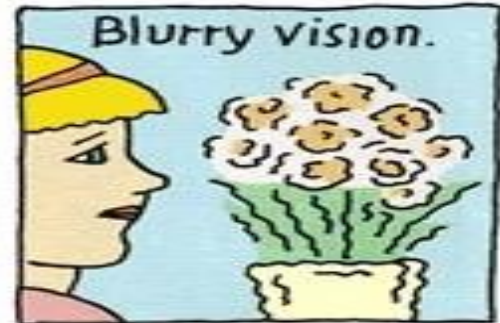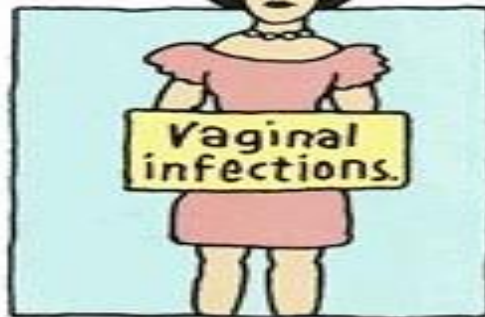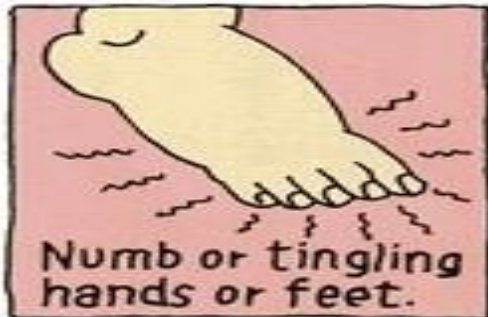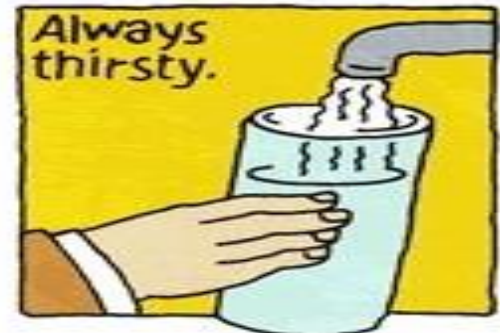

# Complications of Diabetes

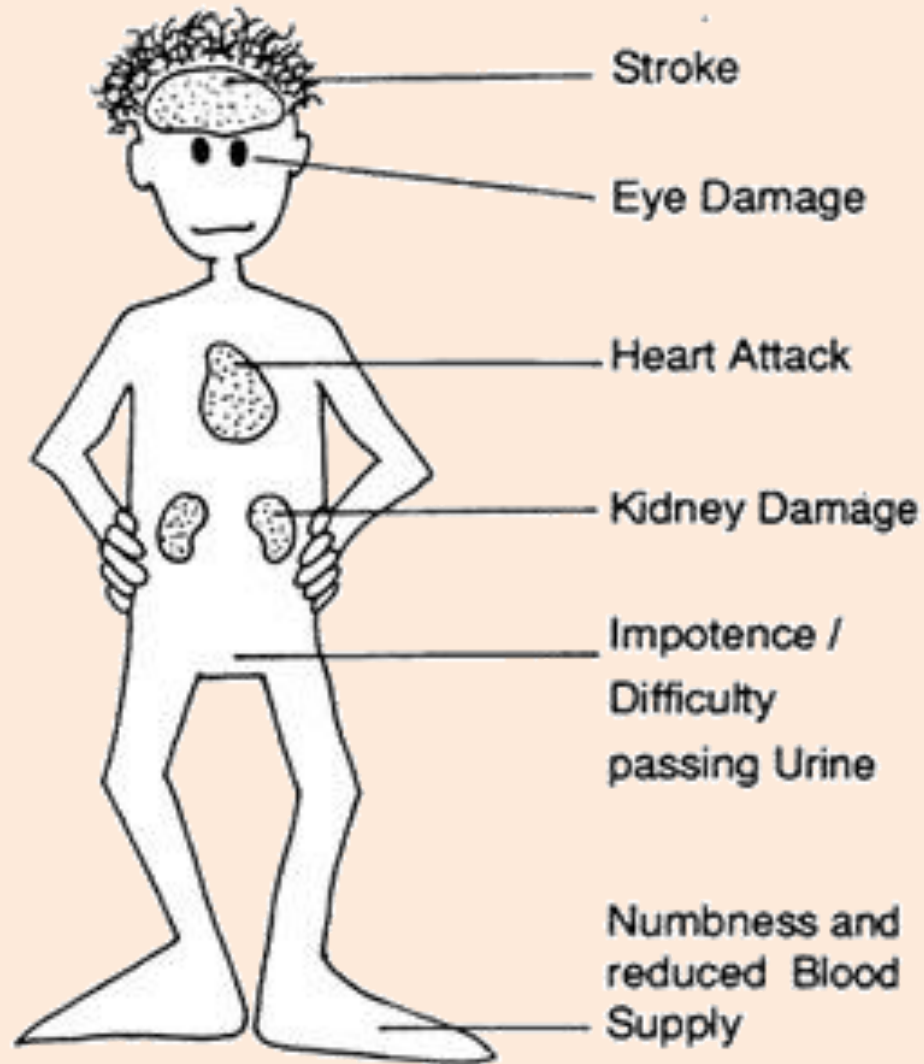



# Damage to the Nerves and Blood Vessels

## Diabetic Retinopathy

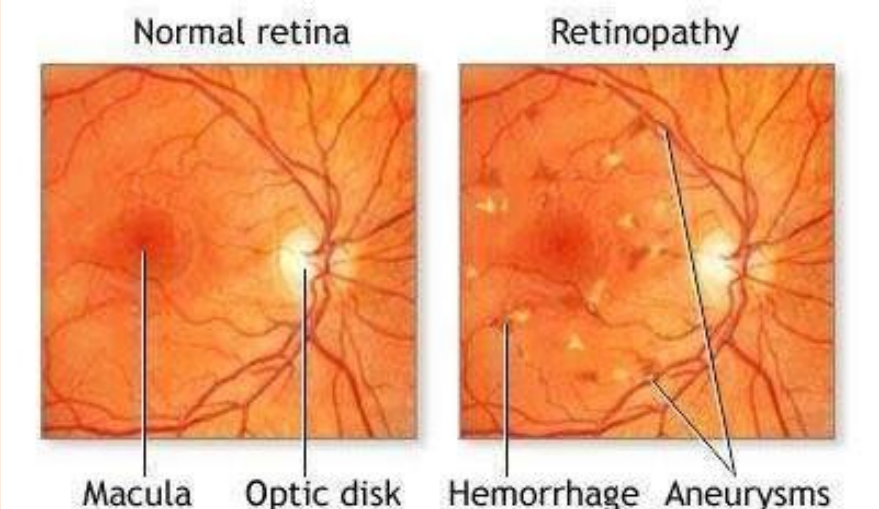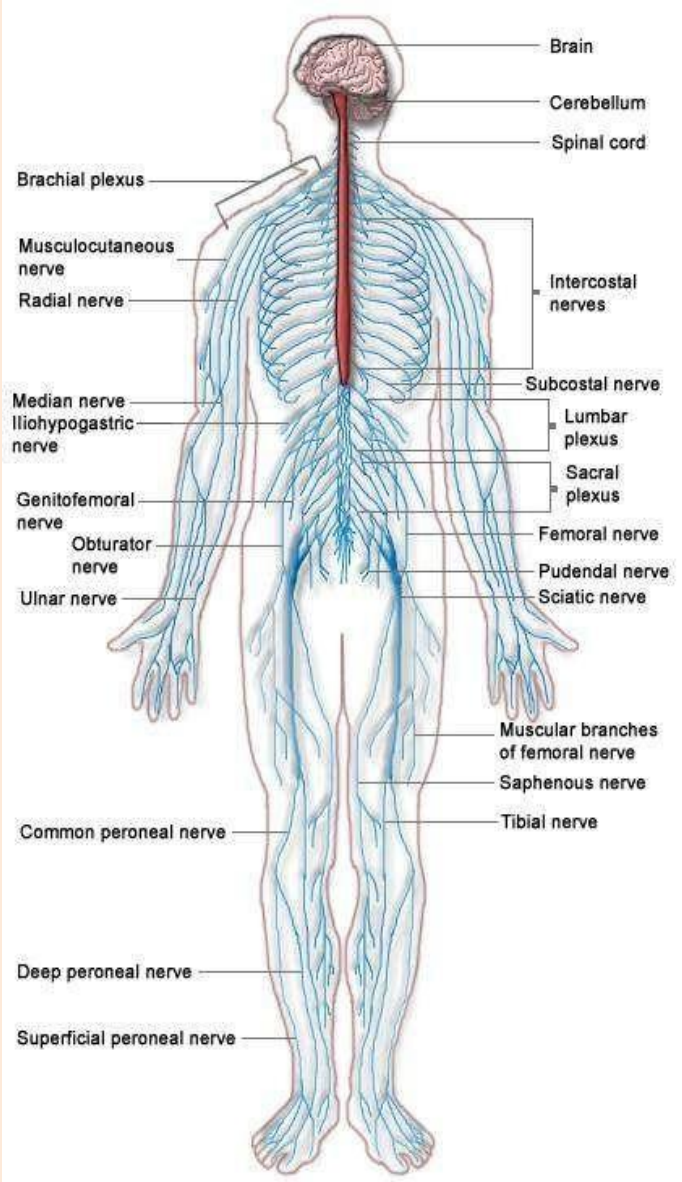

# Diabetic Nephropathy

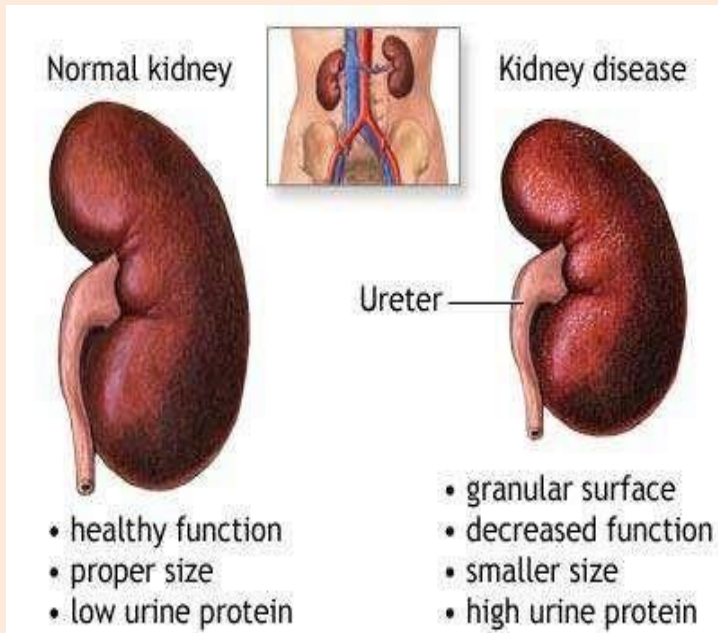

# Diabetic Foot Disease

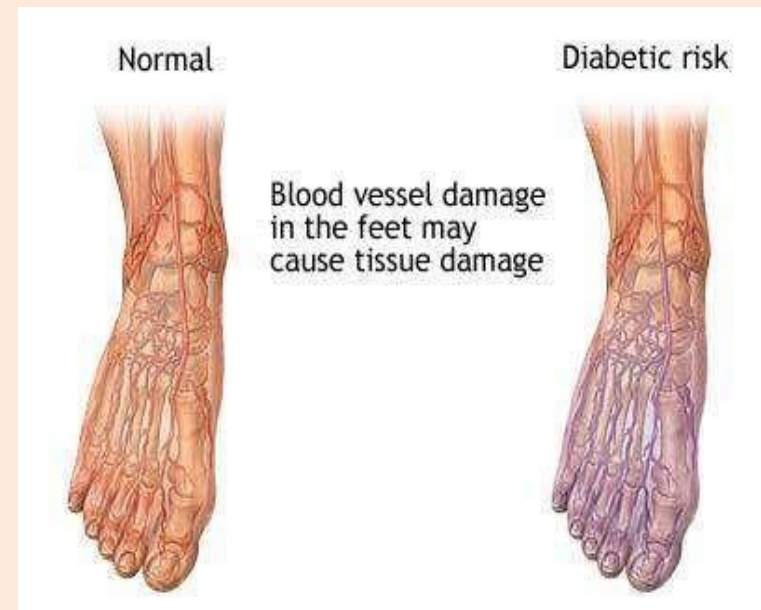

# Symptoms of High Blood Sugar

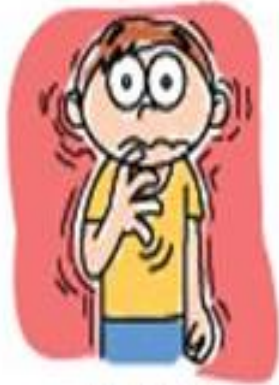

SHAKING

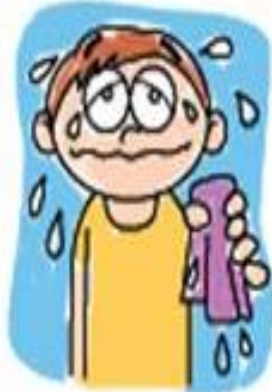

SWEATING

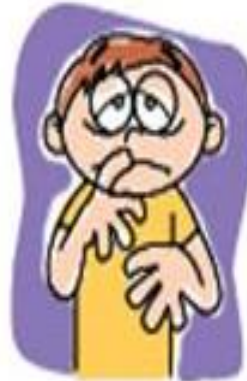

ANXIOUS

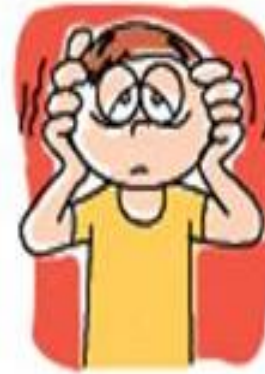

DIZZINESS

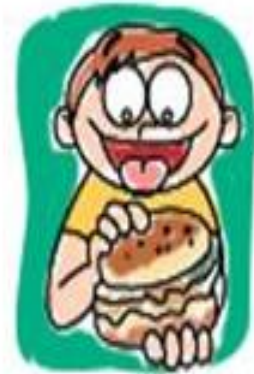

HUNGER

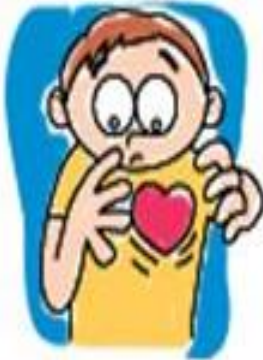

FAST HEARDBEAT

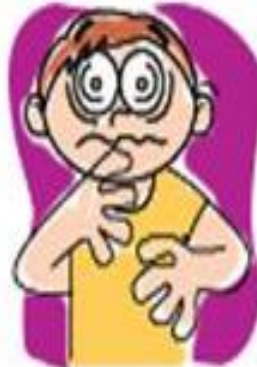

IMPAIRED VISION

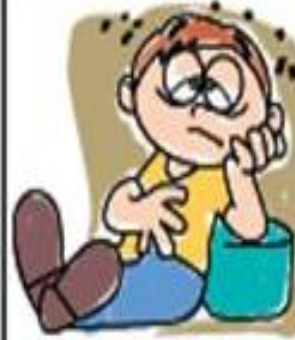

WEAKNESS  
FATIGUE

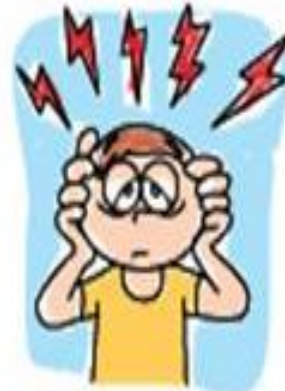

HEADACHE

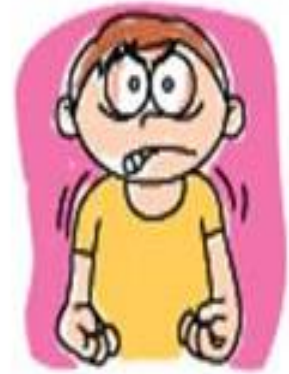

IRRITABLE



# Symptoms of Hypoglycemia

**Causes:** Too little food, too much insulin or diabetes medicine, or extra activity.

**Onset:** Sudden, may progress to insulin shock.

## **SYMPTOMS**

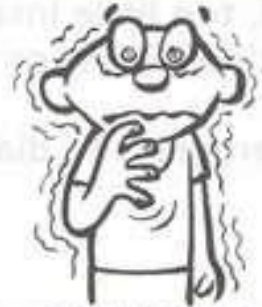

**SHAKING**

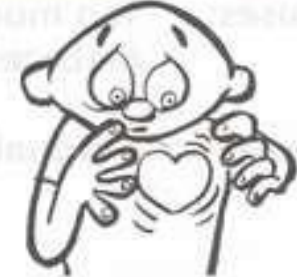

**FAST HEARTBEAT**

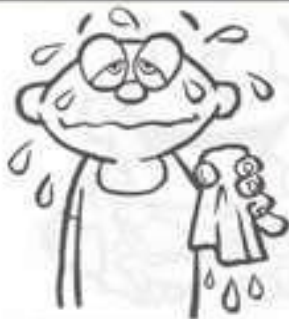

**SWEATING**

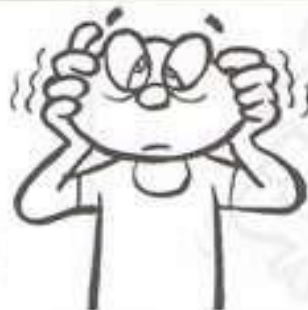

**DIZZINESS**

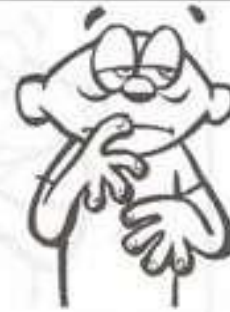

**ANXIOUS**

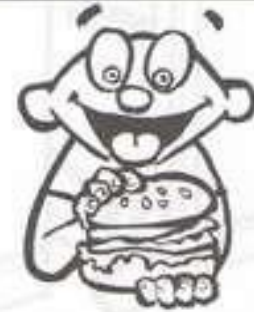

**HUNGER**

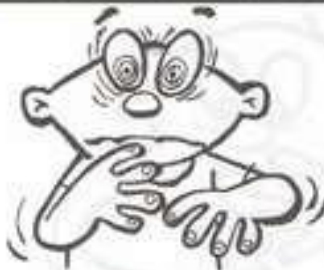

**IMPAIRED VISION**

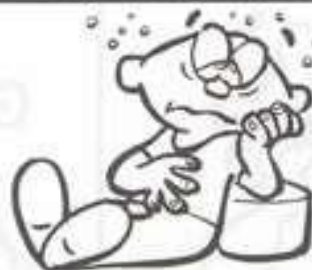

**WEAKNESS FATIGUE**

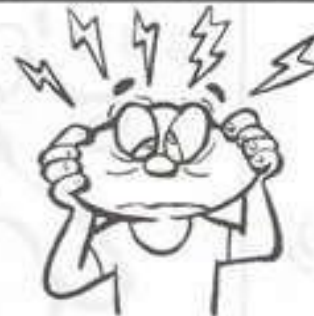

**HEADACHE**

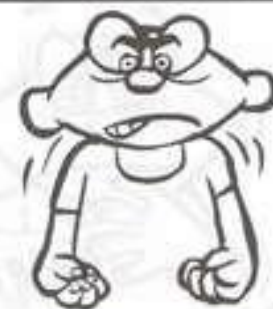

**IRRITABLE**

# Diabetes Management

Diabetes cannot be prevented but it can be well managed by adopting certain control measures

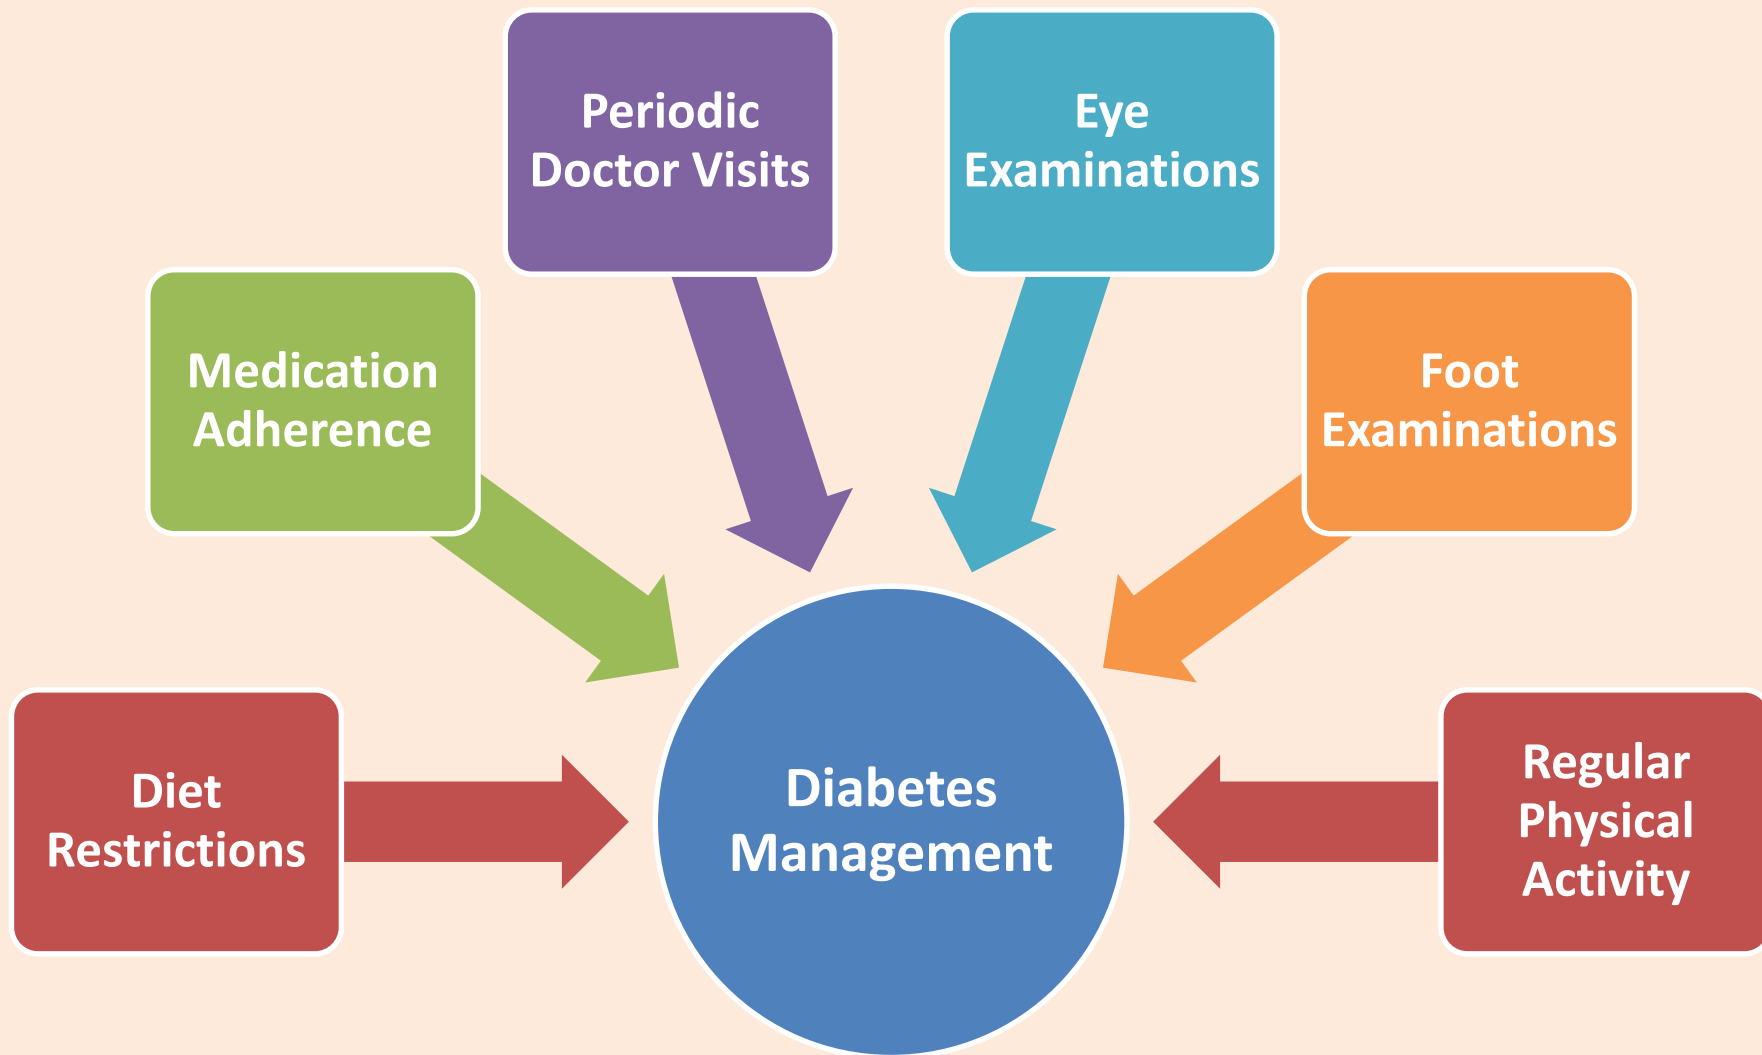

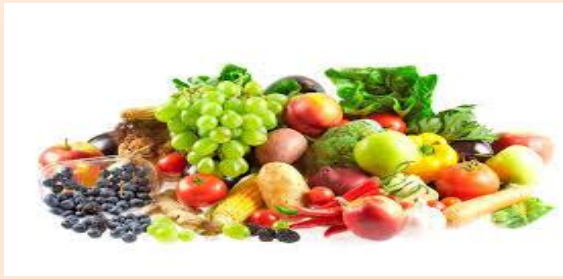

# Diet

- Diabetic diet should have more salads and fresh vegetables
- Food should be consumed in smaller quantities at frequent intervals
- Bakery products and sweets should be avoided

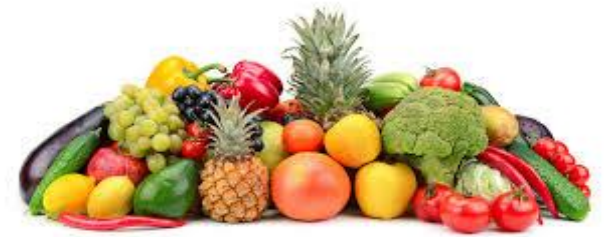

DIABATEIC DIET CHART

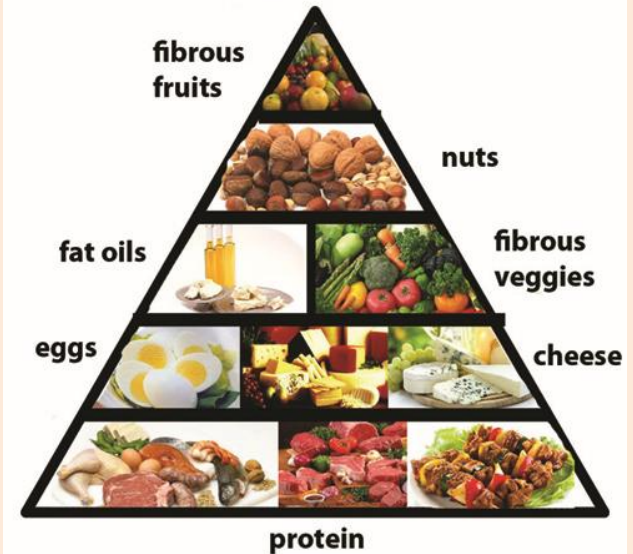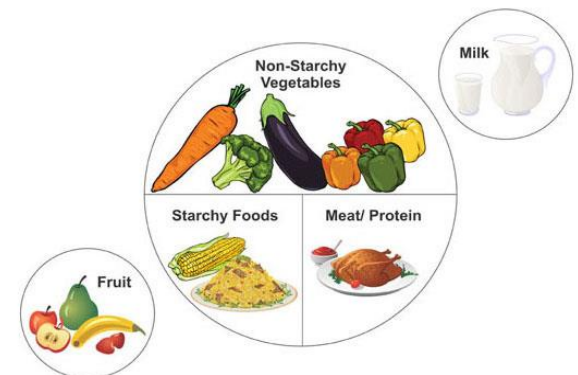

## Whole grains and Legumes

- Consumption of high carbohydrate food should be avoided.
- Ragi, Jowar, Pulses and Legumes that had good nutritious values and proteins should be consumed.

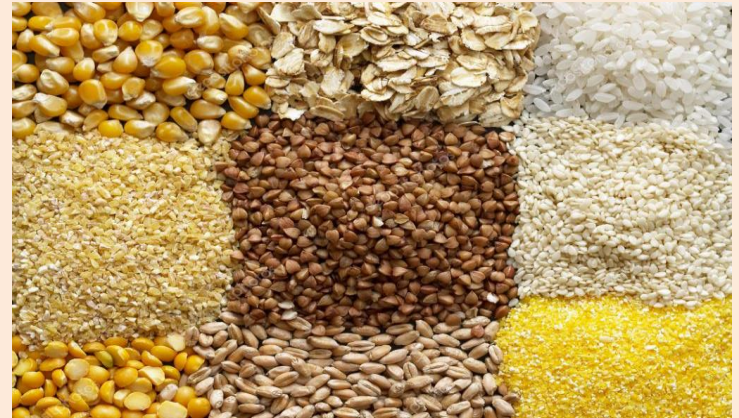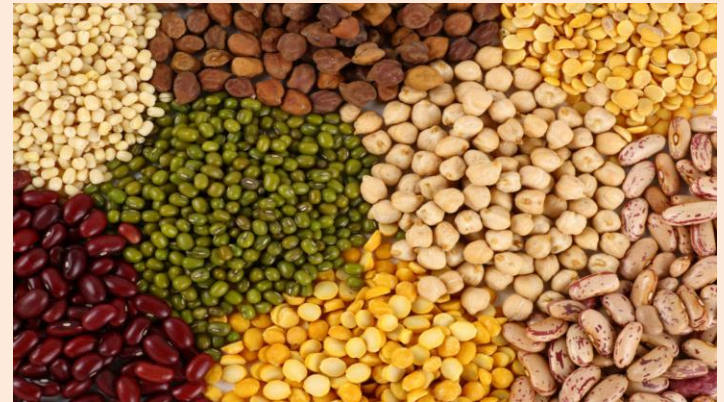



# Vegetables

Fresh vegetables and salads can be consumed along with beans and sprouts

Where as sweet potato, pumpkin, potatoes should be consumed in very limited quantities as they are rich in carbohydrates

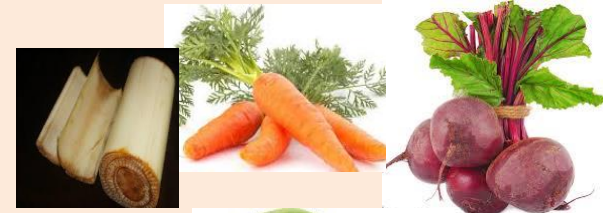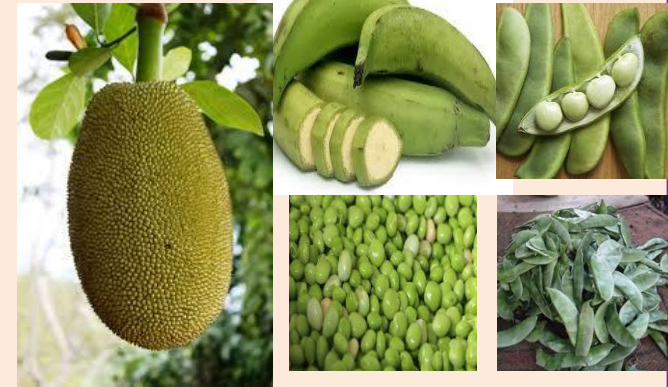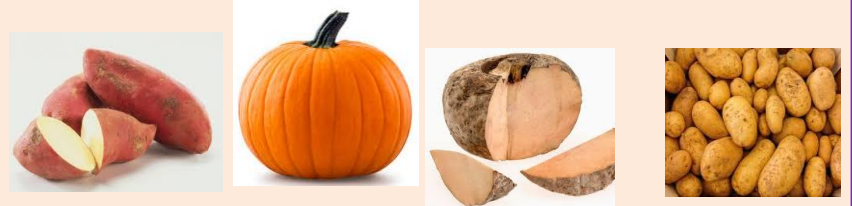

All kinds of green leafy vegetables can be consumed

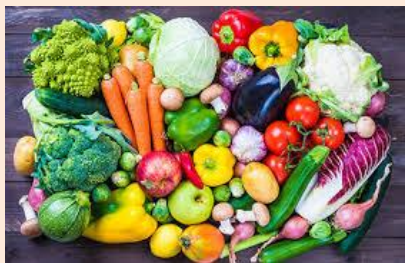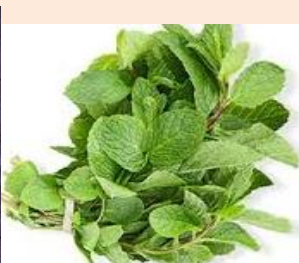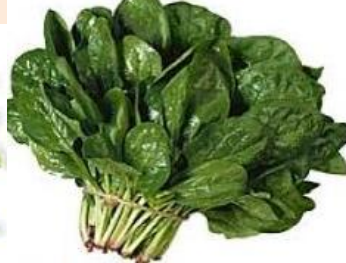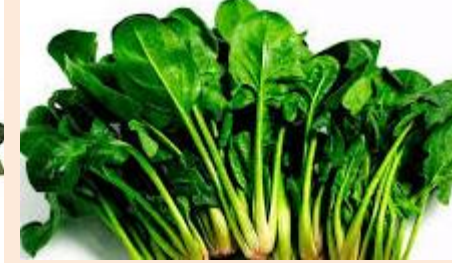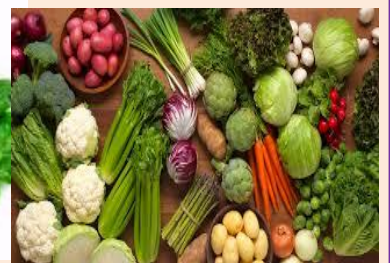

# Fruits

- Fruits contain natural sugars, especially fruits such as banana
- Diabetics can consume the below mentioned fruits in smaller proportions

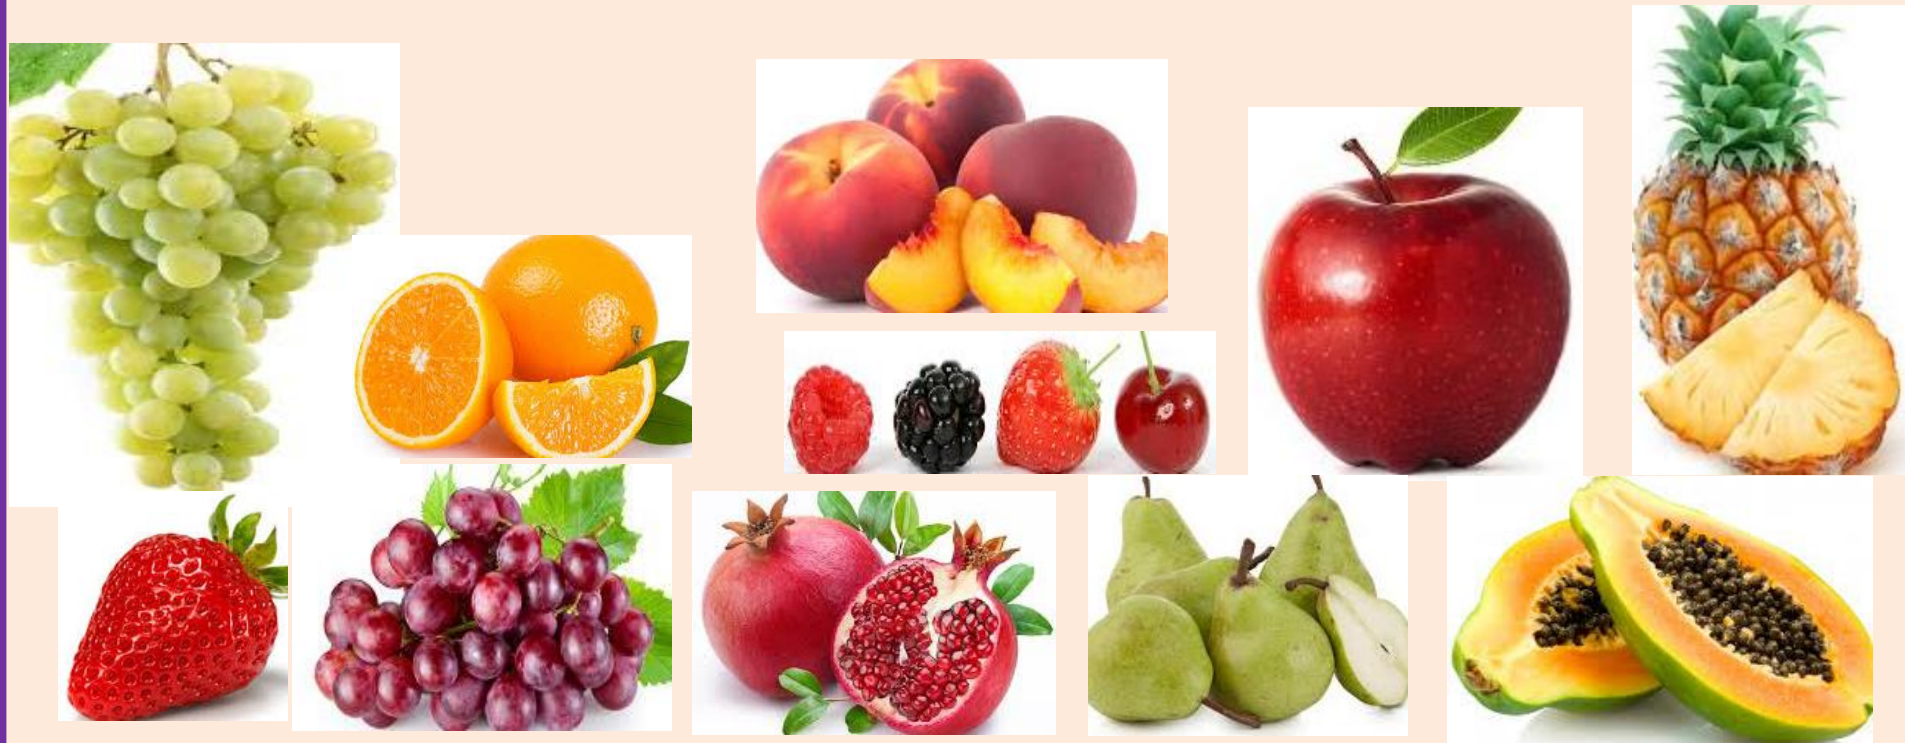

# Dairy Products

Milk is a good source of protein and calcium. Low fat milk, low fat curd and buttermilk can be consumed

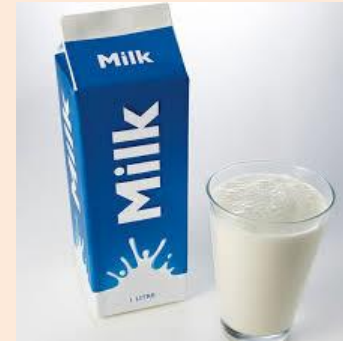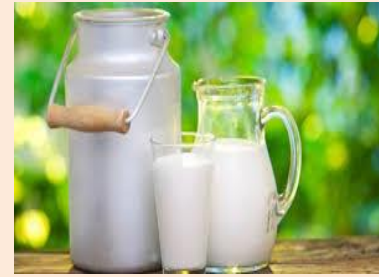

Milk products such as cream, butter, Ghee, condensed milk and paneer can be consumed in very limited quantities

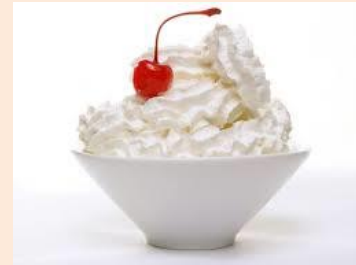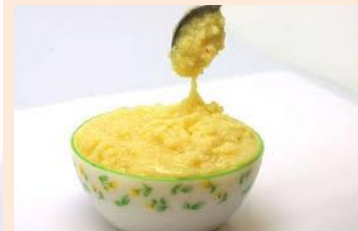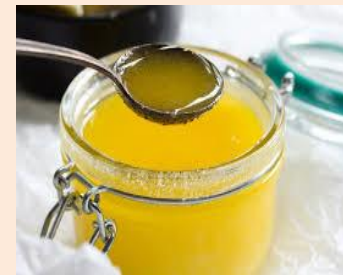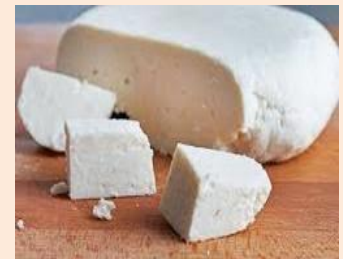



# Oils

- Sun flower oil, refined oil and canola oils can be used to not more than 20 grams per day
- Dalda and vanaspathi oils should be avoided
- Deep fried and processed foods should be avoided to the maximum possible

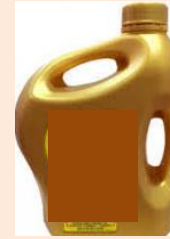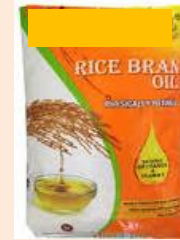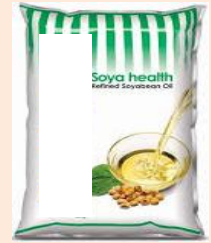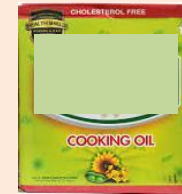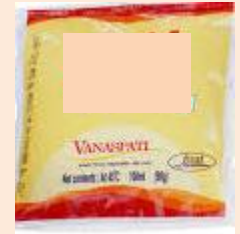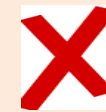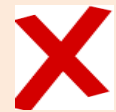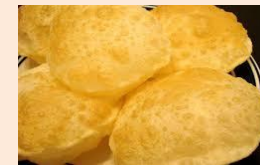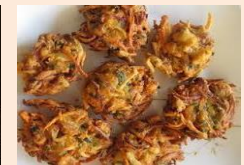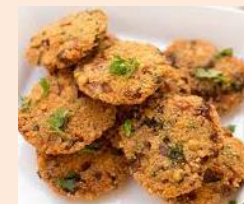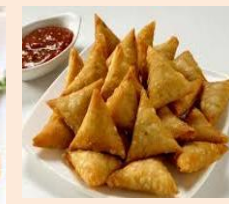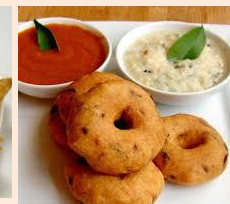



## Dry fruits & nuts

Almonds, Cashew nuts, coconut and ground nuts can be consumed in smaller proportions

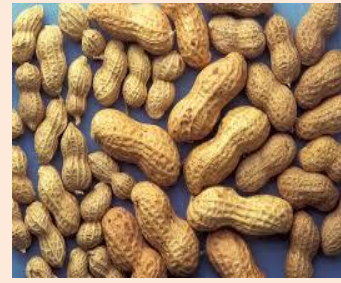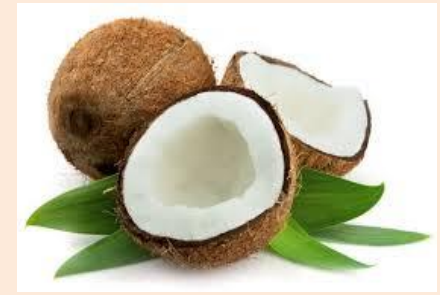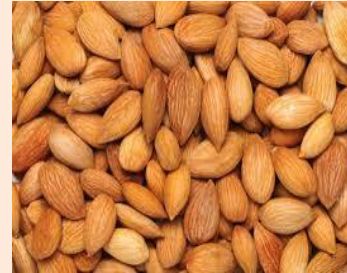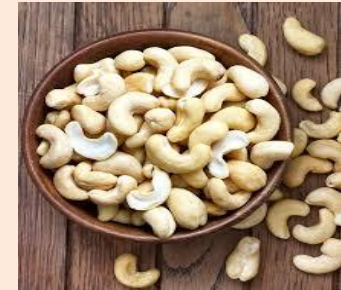

## Meat products

Meat products should be consumed in very smaller proportions

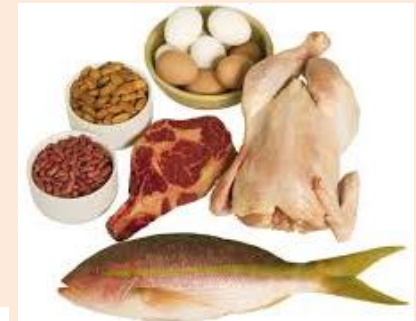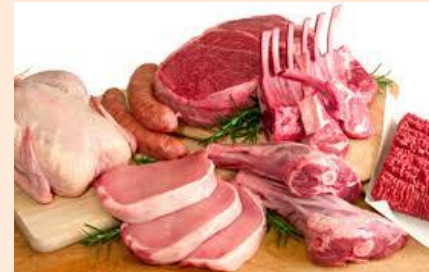

# Beverages and food items that increases your blood sugar

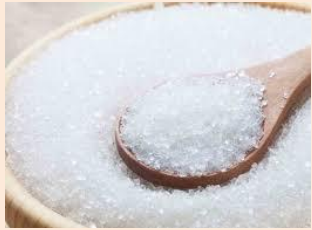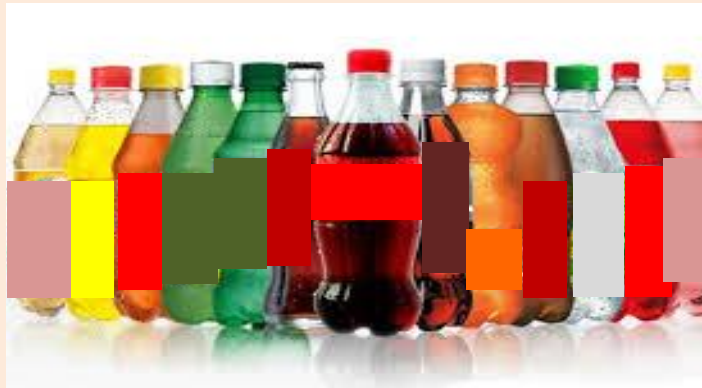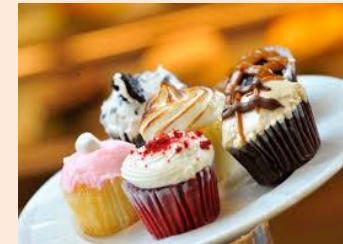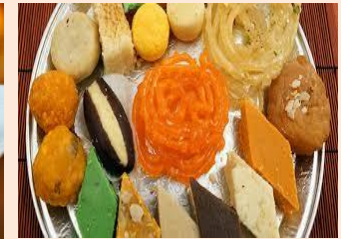

Sugar, Jelly, Jam, Powdered glucose, Sweets, Ice cream, Cool drinks, Chocolates increases blood sugar. So these foods should be avoided

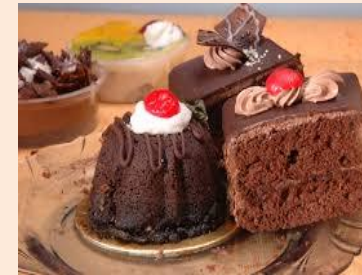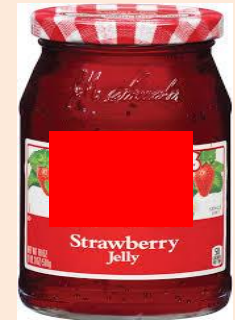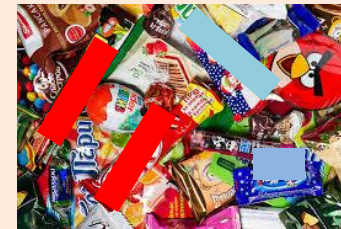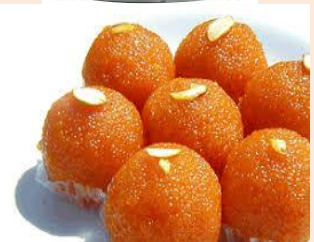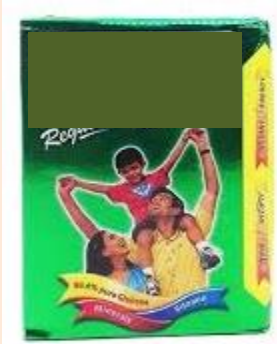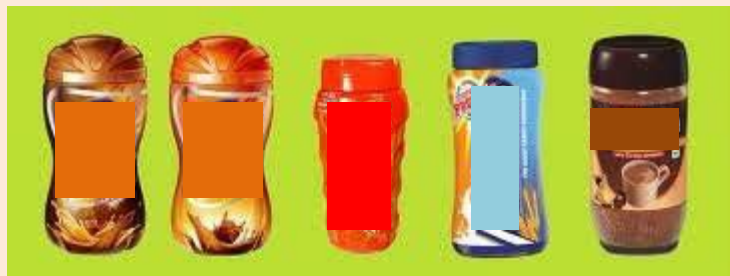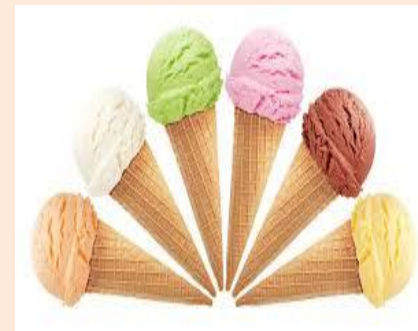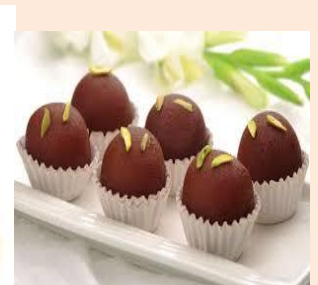

# Medication Adherence and Doctor Visits

- Diabetes medicines helps in controlling the blood glucose levels
- So, Medicines should be taken as directed by the doctor at respective times
- Periodic doctor visits should be made and doctors instructions in diabetes care should be followed

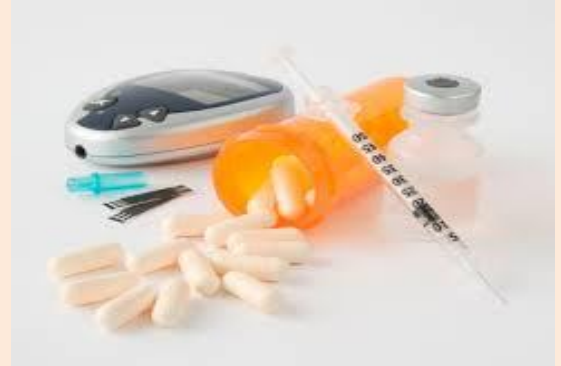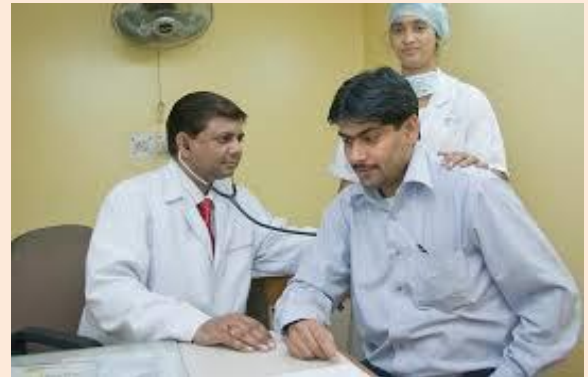



# Regular physical activity

- Regular exercise plays a significant role in controlling blood sugar values
- Physical activity such as walking, cycling, jogging or playing sports should be done for a minimum of 30 minutes per day without fail

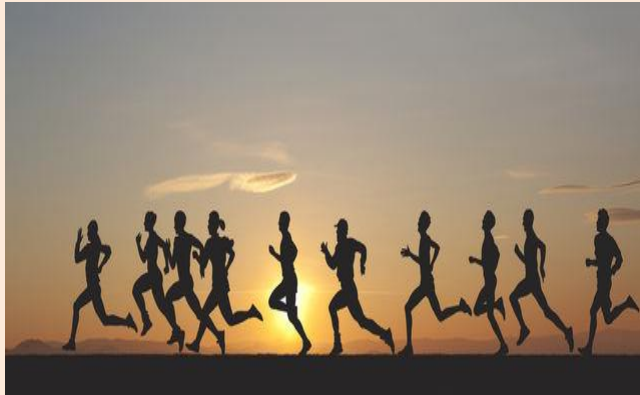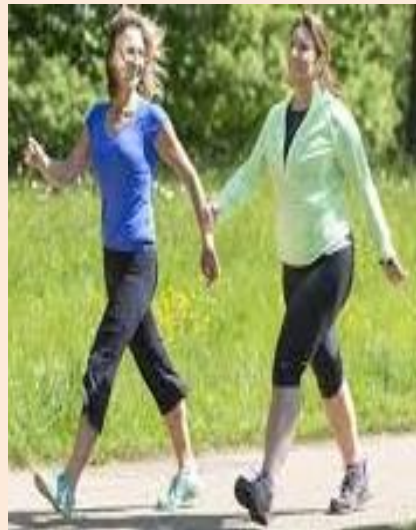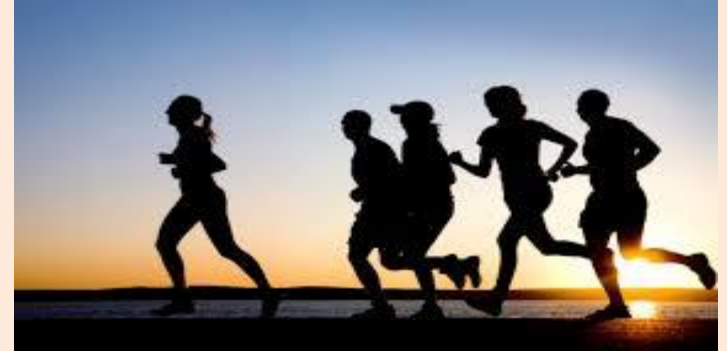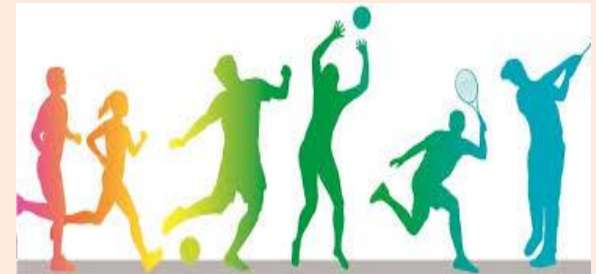



# Eye Examination

Diabetic patients should be consulting ophthalmologist once in every 6 months at least for regular eye examination.

**If you have any of the following**

- Blurring of vision
- Itching and burning of eyes
- Poor vision

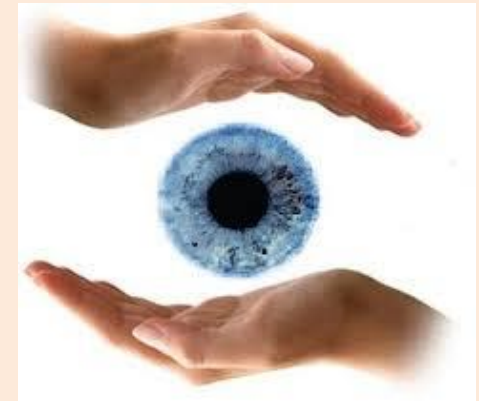

**Protect your eyes**

**Please contact your doctor immediately**

# Foot Examination

- Check your feet every day
- Look for cuts, blisters, red spots, swelling
- Wash your feet every day in warm (not hot) water
- Keep your feet soft and smooth
- Trim toenails weekly
- Never walk barefoot

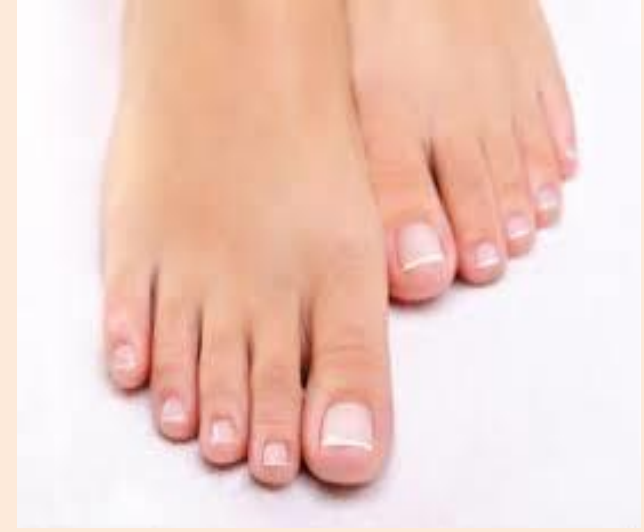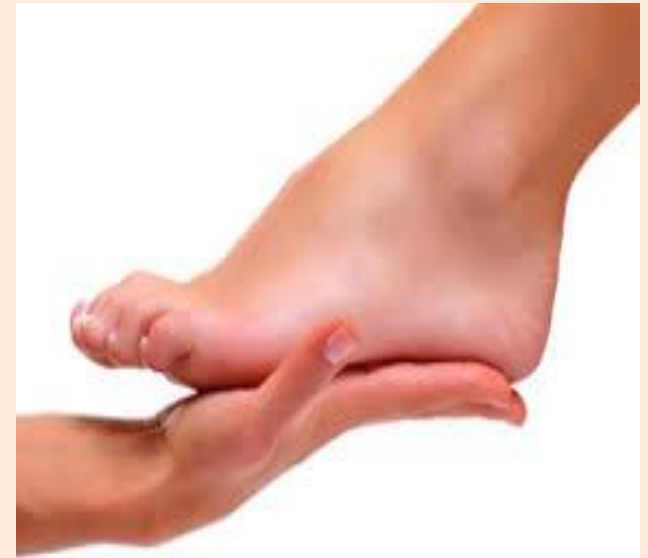

# Know your blood sugar values

- Get your HbA1C tested once in every 3 months.
- HbA1c investigation helps in identifying the average blood glucose levels in your body for past 3 months.
- Diabetes can be better managed if periodic HbA1c levels are known.

Normal Blood Glucose: 80-120 mg/dl

**HbA1C < 7**

# Diabetes Associated Complications

Uncontrolled diabetes could lead to the following complications

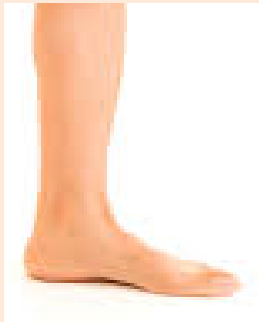

**Foot Ulcers**

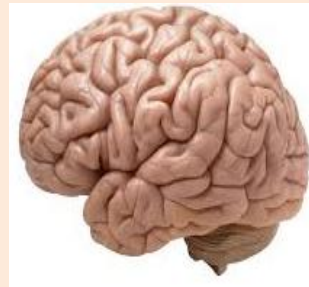

**Stroke**

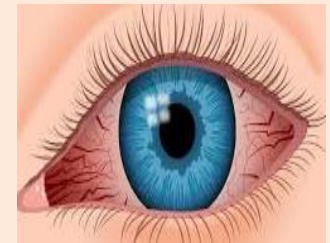

**Eye problems**

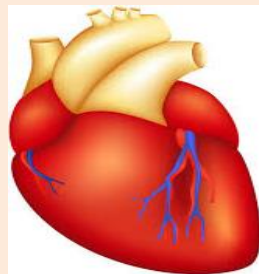

**Heart Diseases**

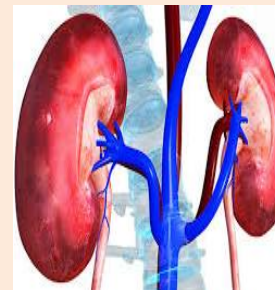

**Kidney diseases**
