# Supplementary material for: Intervention through Short Messaging System (SMS) and phone call alerts reduced HbA1C levels in ~47% type-2 diabetics–results of a pilot study
Source: PubMed Central journal article supplement (PMC7671489; doi:10.1371/journal.pone.0241830), 2020-11-17
Supplement: pone.0241830.s012.pdf [file pone.0241830.s012.pdf]

## Diabetes Knowledge Assessment Questionnaire

a) Symptoms of diabetes include \_\_\_\_\_

1. Excessive thirst
2. Hunger
3. Frequent urination
4. Weight loss

b) Best practices to keep diabetes under control include \_\_\_\_\_

1. Regular exercise
2. Controlled diet
3. Medication adherence
4. Periodic doctor visit

c) Uncontrolled diabetes could lead to these diseases \_\_\_\_\_

1. Heart disease
2. Eye problems
3. Stroke
4. Neurological diseases
5. Kidney diseases
6. foot ulcers

d) Symptoms of hypo glycaemia includes

1. Dizziness
2. Hunger
3. Sweating
4. Shakiness
5. Anxiety
6. Moodiness

e) Excellent glucose control is indicated by which of the below ranges mentioned

1. <80 MG/DL
2. 80-120 MG/DL
3. 120-180 MG/DL
4. >180 MG/DL

f) Blood test which gives accurate reading of glucose value and has to be done every 3-4 months is \_\_\_\_\_

1. Fasting
2. PPBS
3. HbA1C

## **Program Feedback**

1. Is the program helping you in self management of diabetes? Y\_\_\_\_ N\_\_\_\_

2. Are weekly phone calls helping you better than SMS? Y\_\_\_\_N \_\_\_\_

3. Are you confident to manage diabetes on your own? Y\_\_\_\_ N\_\_\_\_
