# Supplementary material for: Intervention through Short Messaging System (SMS) and phone call alerts reduced HbA1C levels in ~47% type-2 diabetics–results of a pilot study
Source: PLoS One. 2020 Nov 17;15(11):e0241830. doi: 10.1371/journal.pone.0241830 (PMC7671489; doi:10.1371/journal.pone.0241830)
Supplement: S16 File — The weekly phone call log sheet was designed to cross verify the delivery of diabetes educational materials as well as to add any additional remarks mentioned by study participants. (PDF) [file pone.0241830.s016.pdf]

**Annexure-9**

**Diabetes Management**

| Date | call# | Call Start Time | Call End Time | Diet | Exercise | Medication adherence | Eye problem | Kidney Disorders | Cardiac Diseases | Stroke | Skin diseases | Foot Ulcers | Periodic doctor visit | Blood sugar investigations (Fasting, PPBS and HbA1C) | If any problems consult doctor |
|------|-------|-----------------|---------------|------|----------|----------------------|-------------|------------------|------------------|--------|---------------|-------------|-----------------------|------------------------------------------------------|--------------------------------|
|      |       |                 |               |      |          |                      |             |                  |                  |        |               |             |                       |                                                      |                                |
|      |       |                 |               |      |          |                      |             |                  |                  |        |               |             |                       |                                                      |                                |
|      |       |                 |               |      |          |                      |             |                  |                  |        |               |             |                       |                                                      |                                |
|      |       |                 |               |      |          |                      |             |                  |                  |        |               |             |                       |                                                      |                                |
|      |       |                 |               |      |          |                      |             |                  |                  |        |               |             |                       |                                                      |                                |
|      |       |                 |               |      |          |                      |             |                  |                  |        |               |             |                       |                                                      |                                |
|      |       |                 |               |      |          |                      |             |                  |                  |        |               |             |                       |                                                      |                                |
|      |       |                 |               |      |          |                      |             |                  |                  |        |               |             |                       |                                                      |                                |
|      |       |                 |               |      |          |                      |             |                  |                  |        |               |             |                       |                                                      |                                |
|      |       |                 |               |      |          |                      |             |                  |                  |        |               |             |                       |                                                      |                                |
|      |       |                 |               |      |          |                      |             |                  |                  |        |               |             |                       |                                                      |                                |
|      |       |                 |               |      |          |                      |             |                  |                  |        |               |             |                       |                                                      |                                |
|      |       |                 |               |      |          |                      |             |                  |                  |        |               |             |                       |                                                      |                                |

**Patient ID:**
